# Supplementary material for: Chemical conversion of β-O-4 lignin linkage models through Cu-catalyzed aerobic amide bond formation
Source: Royal Society of Chemistry journal article supplement (doi:10.1039/c3cc46912c), 2013-01-01

ZJ06-116-1 400 MHz CDCl<sub>3</sub>

(2aa)

0.98

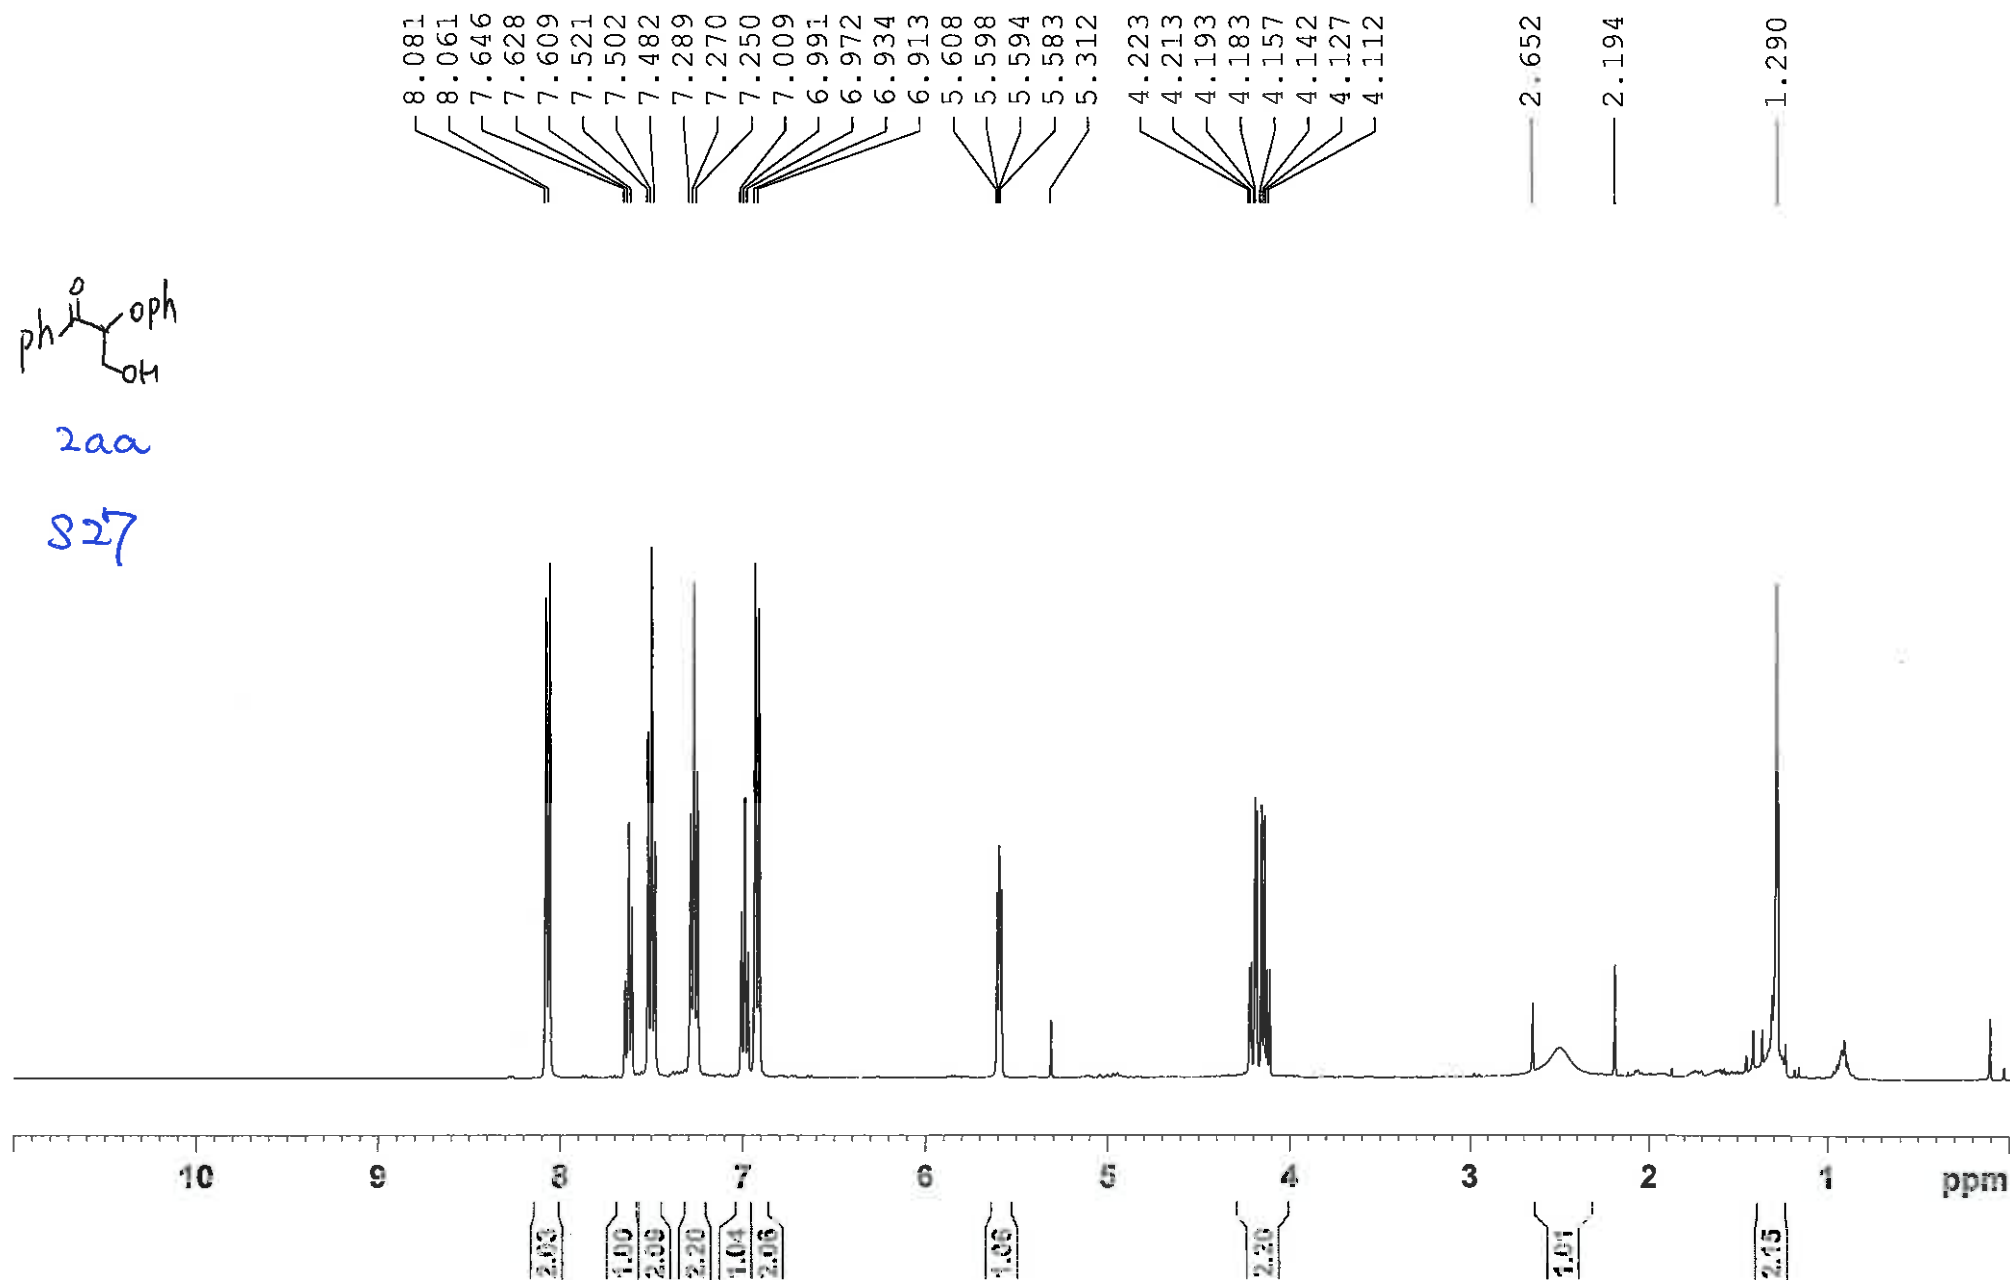

ZJ06-116-1-13C 400 MHz CDCl3

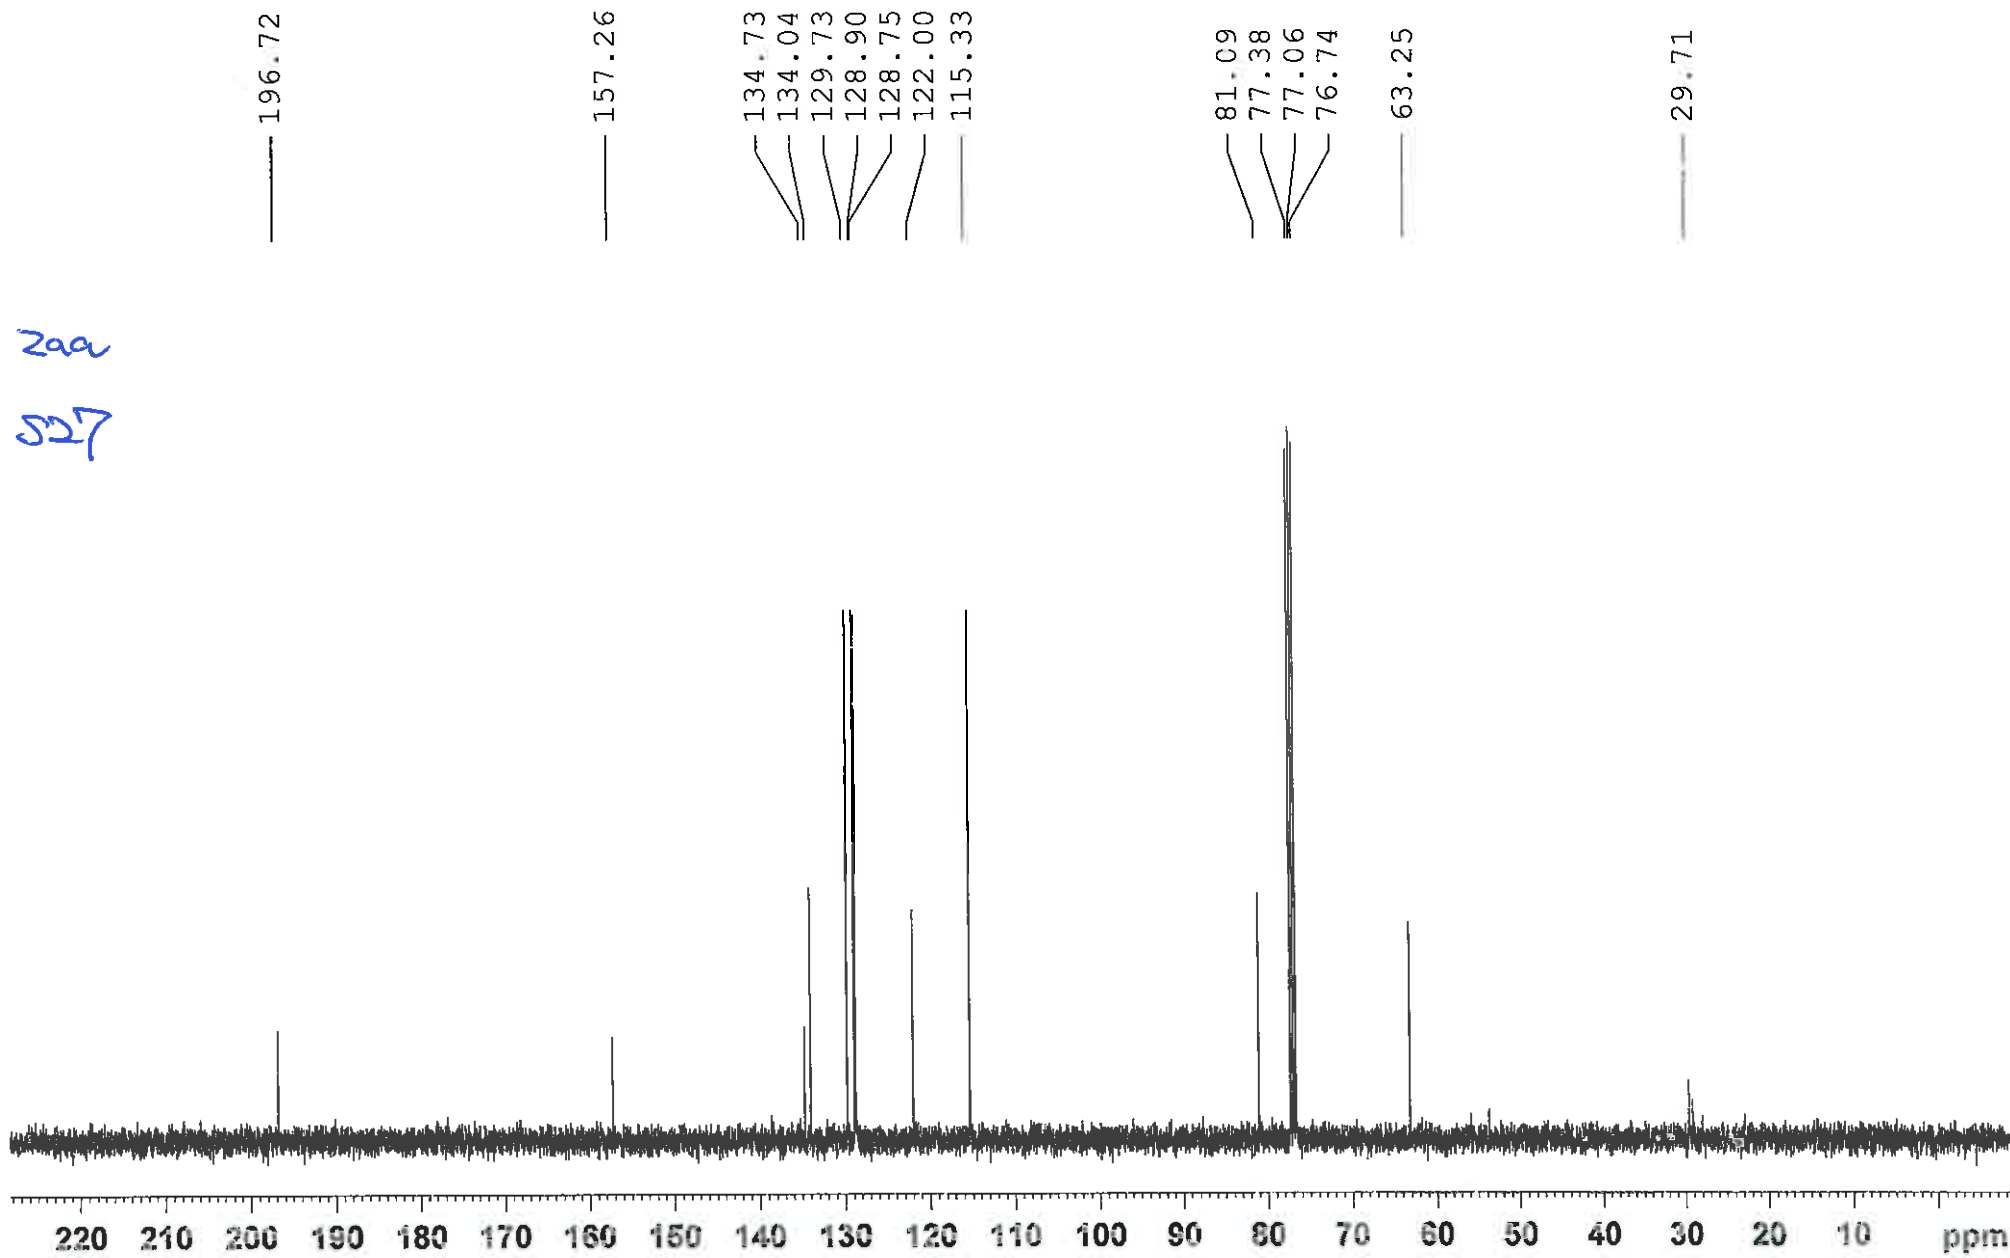

ZJ06-178-3, CDCl<sub>3</sub>, 400M, 1H

2dd

528

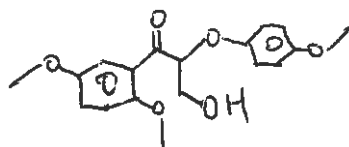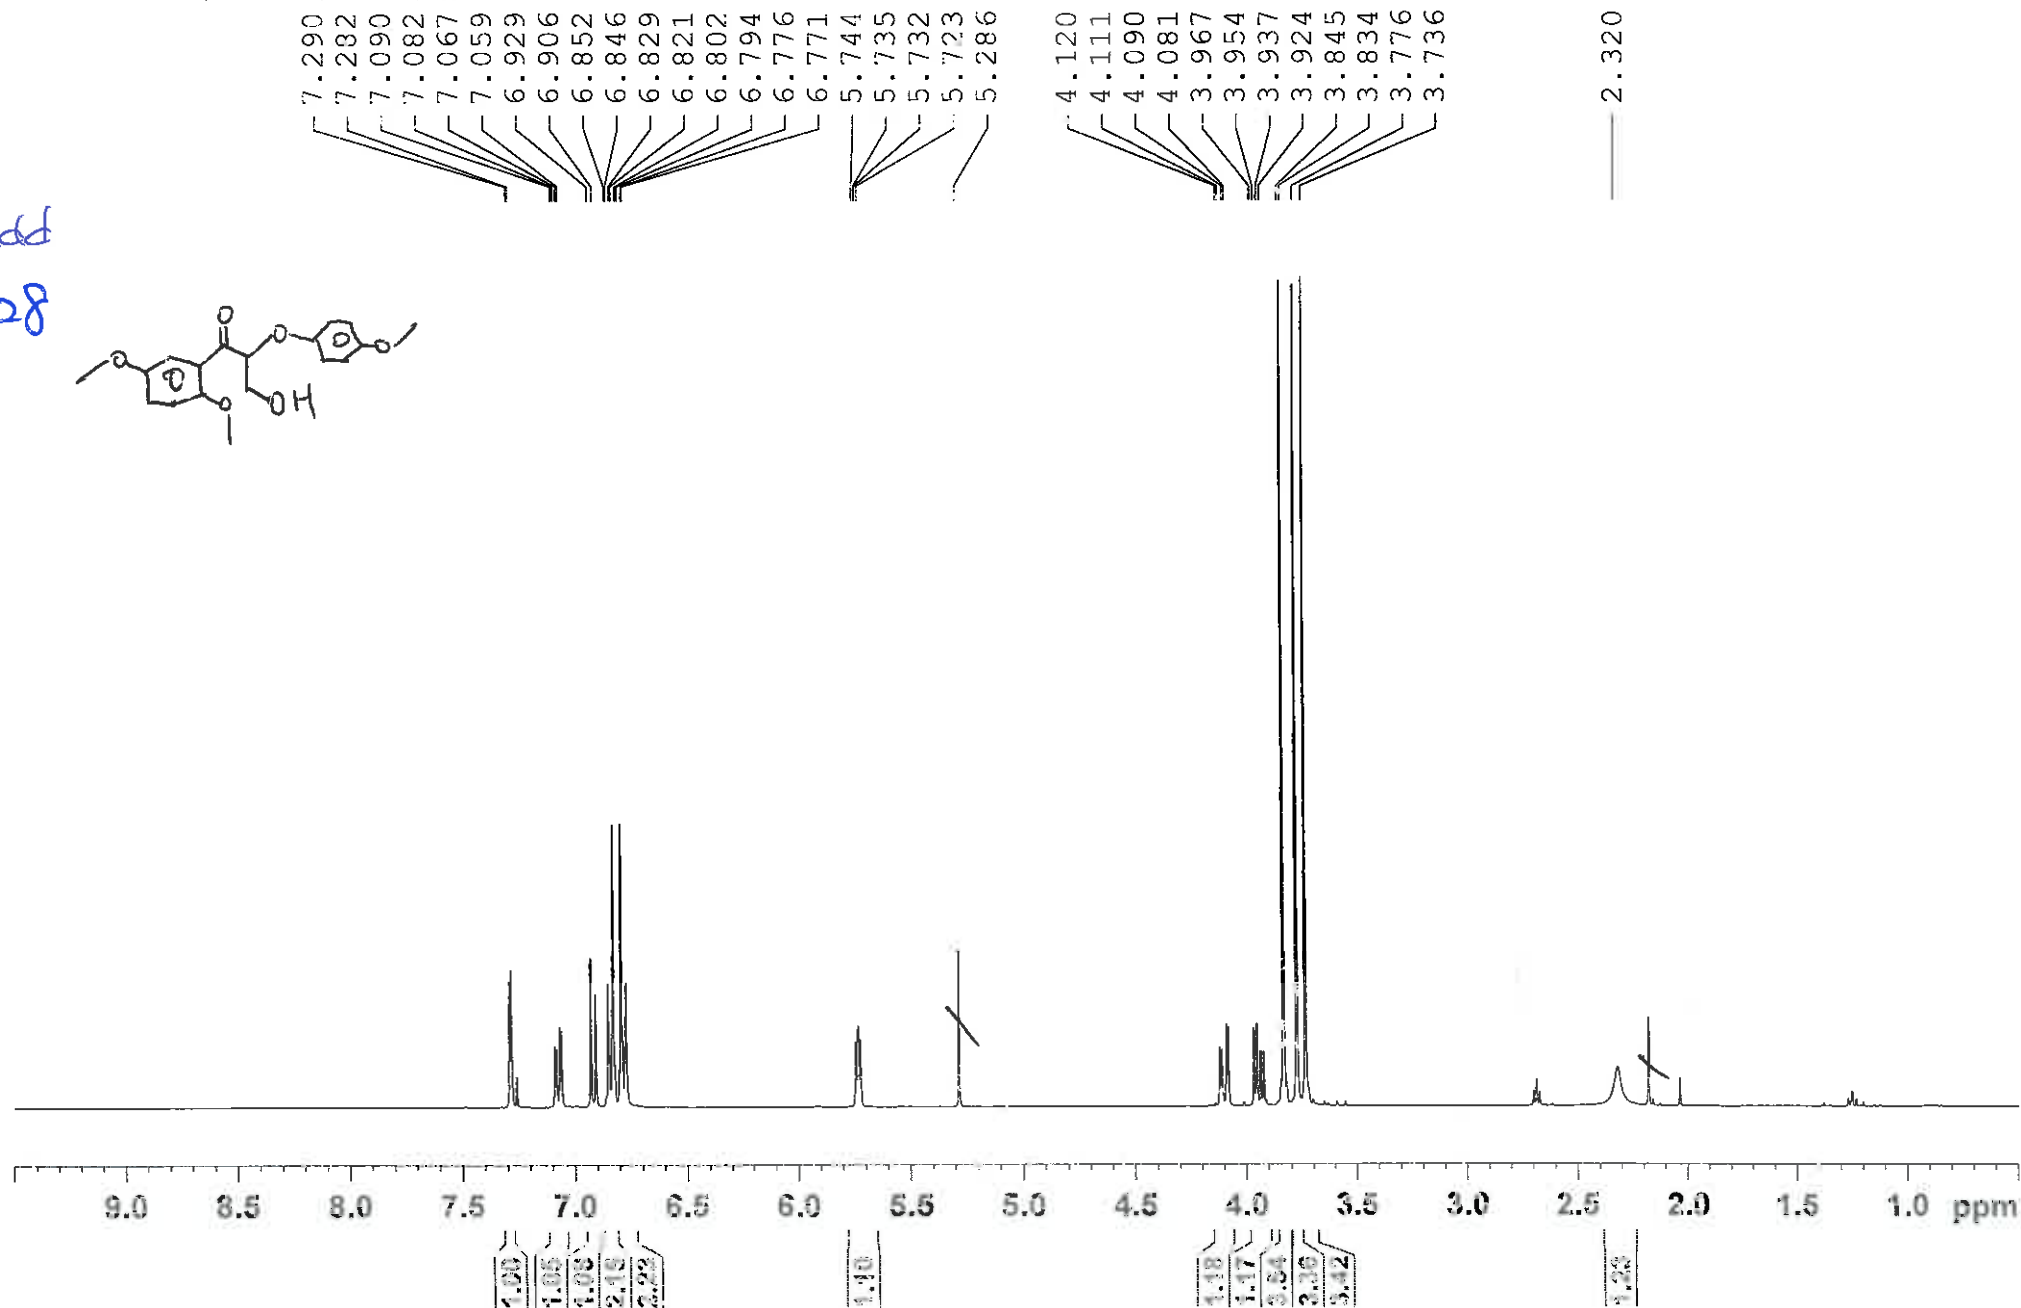

ZJ06-178-3-13C, CDCl3, 400M, 1H

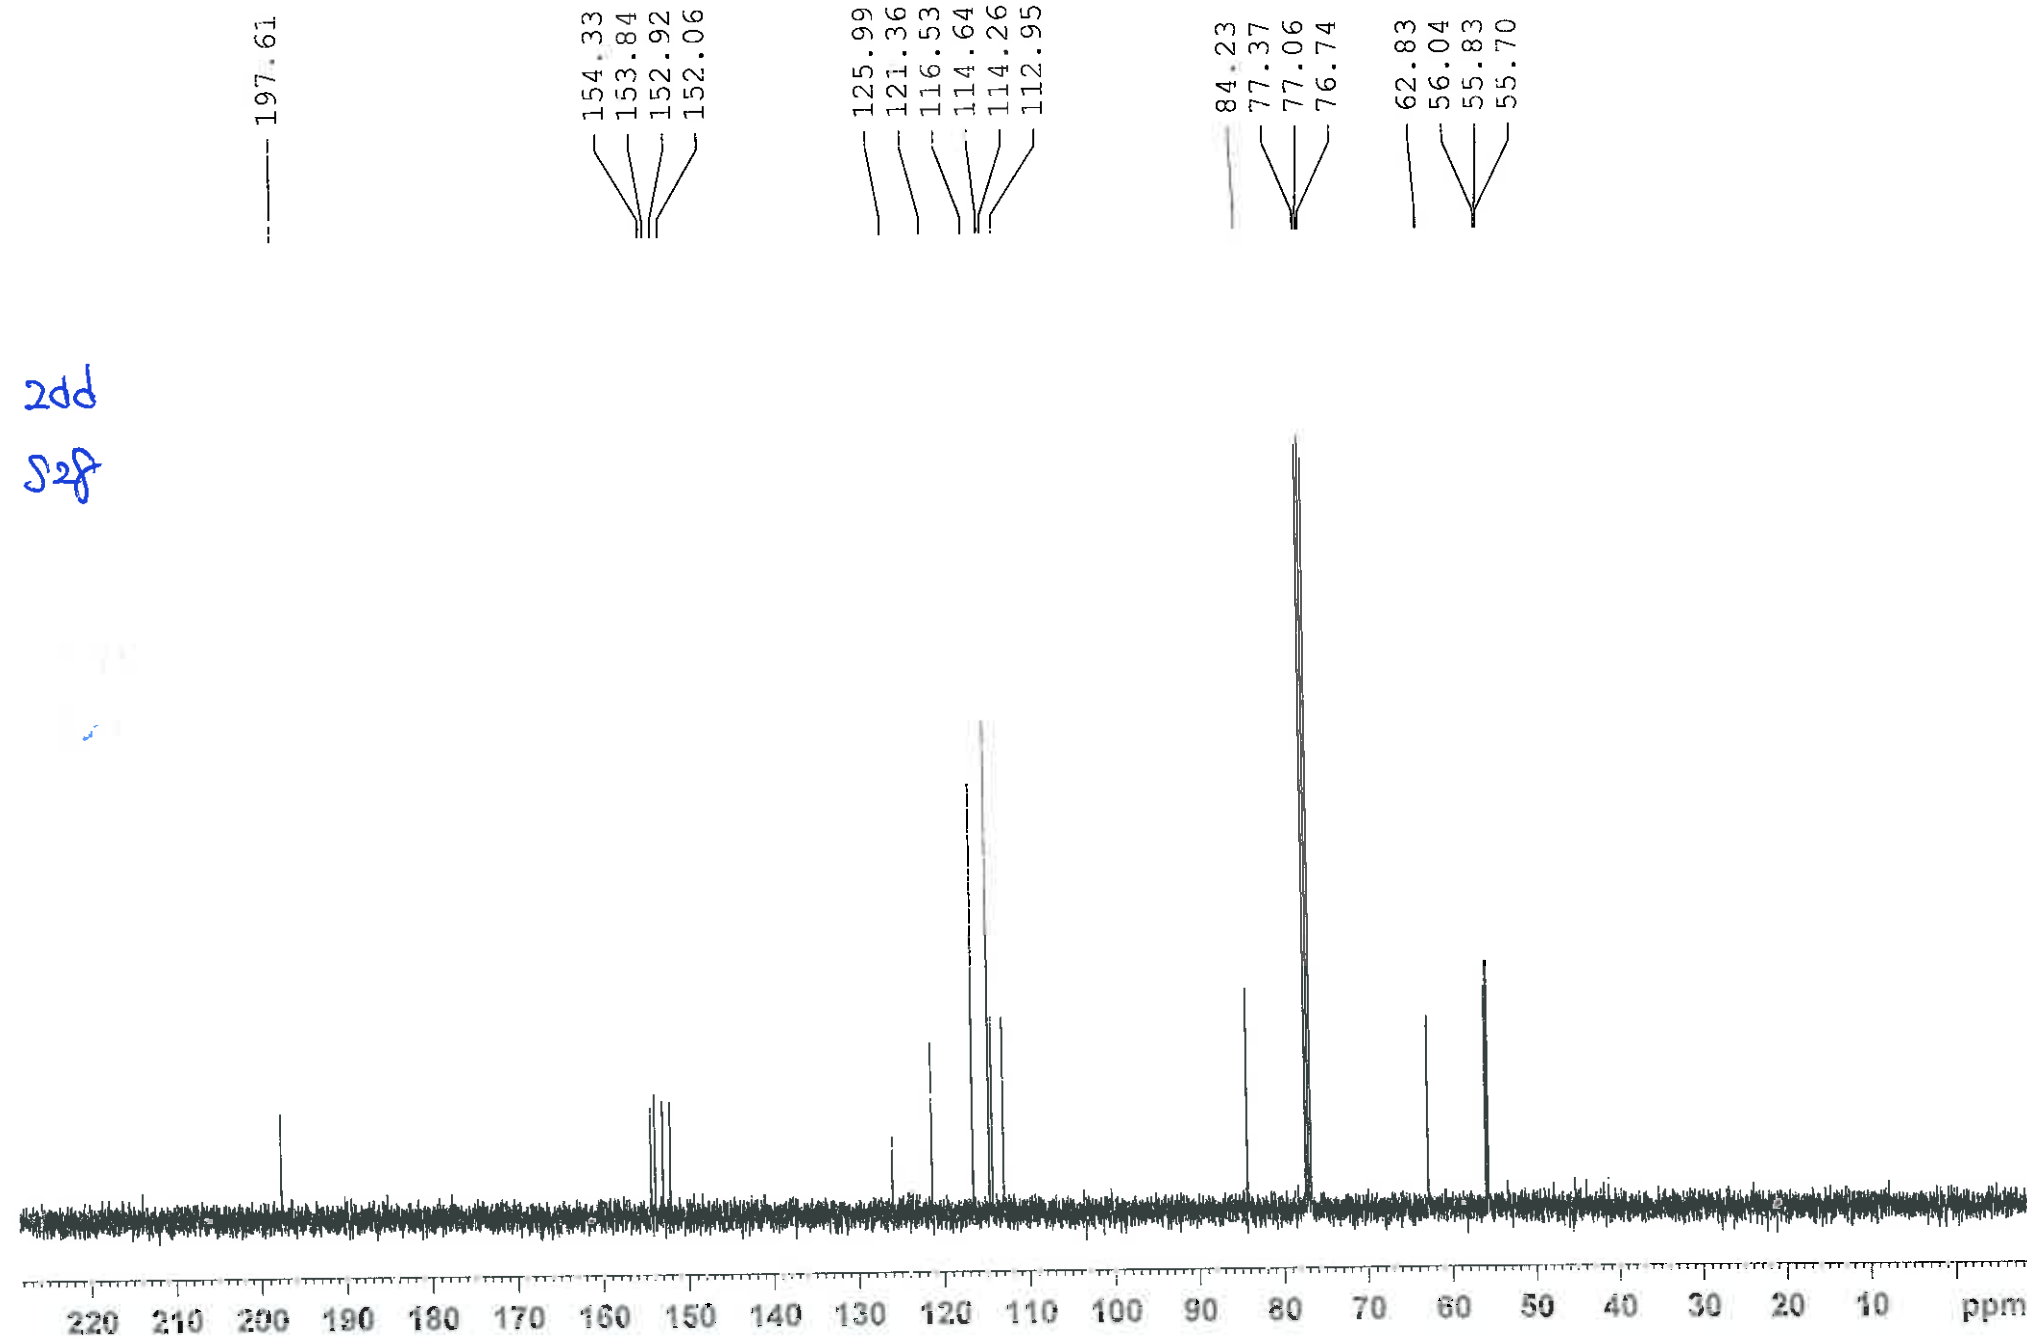

ZJ06-122-2    400 MHz   CDC13

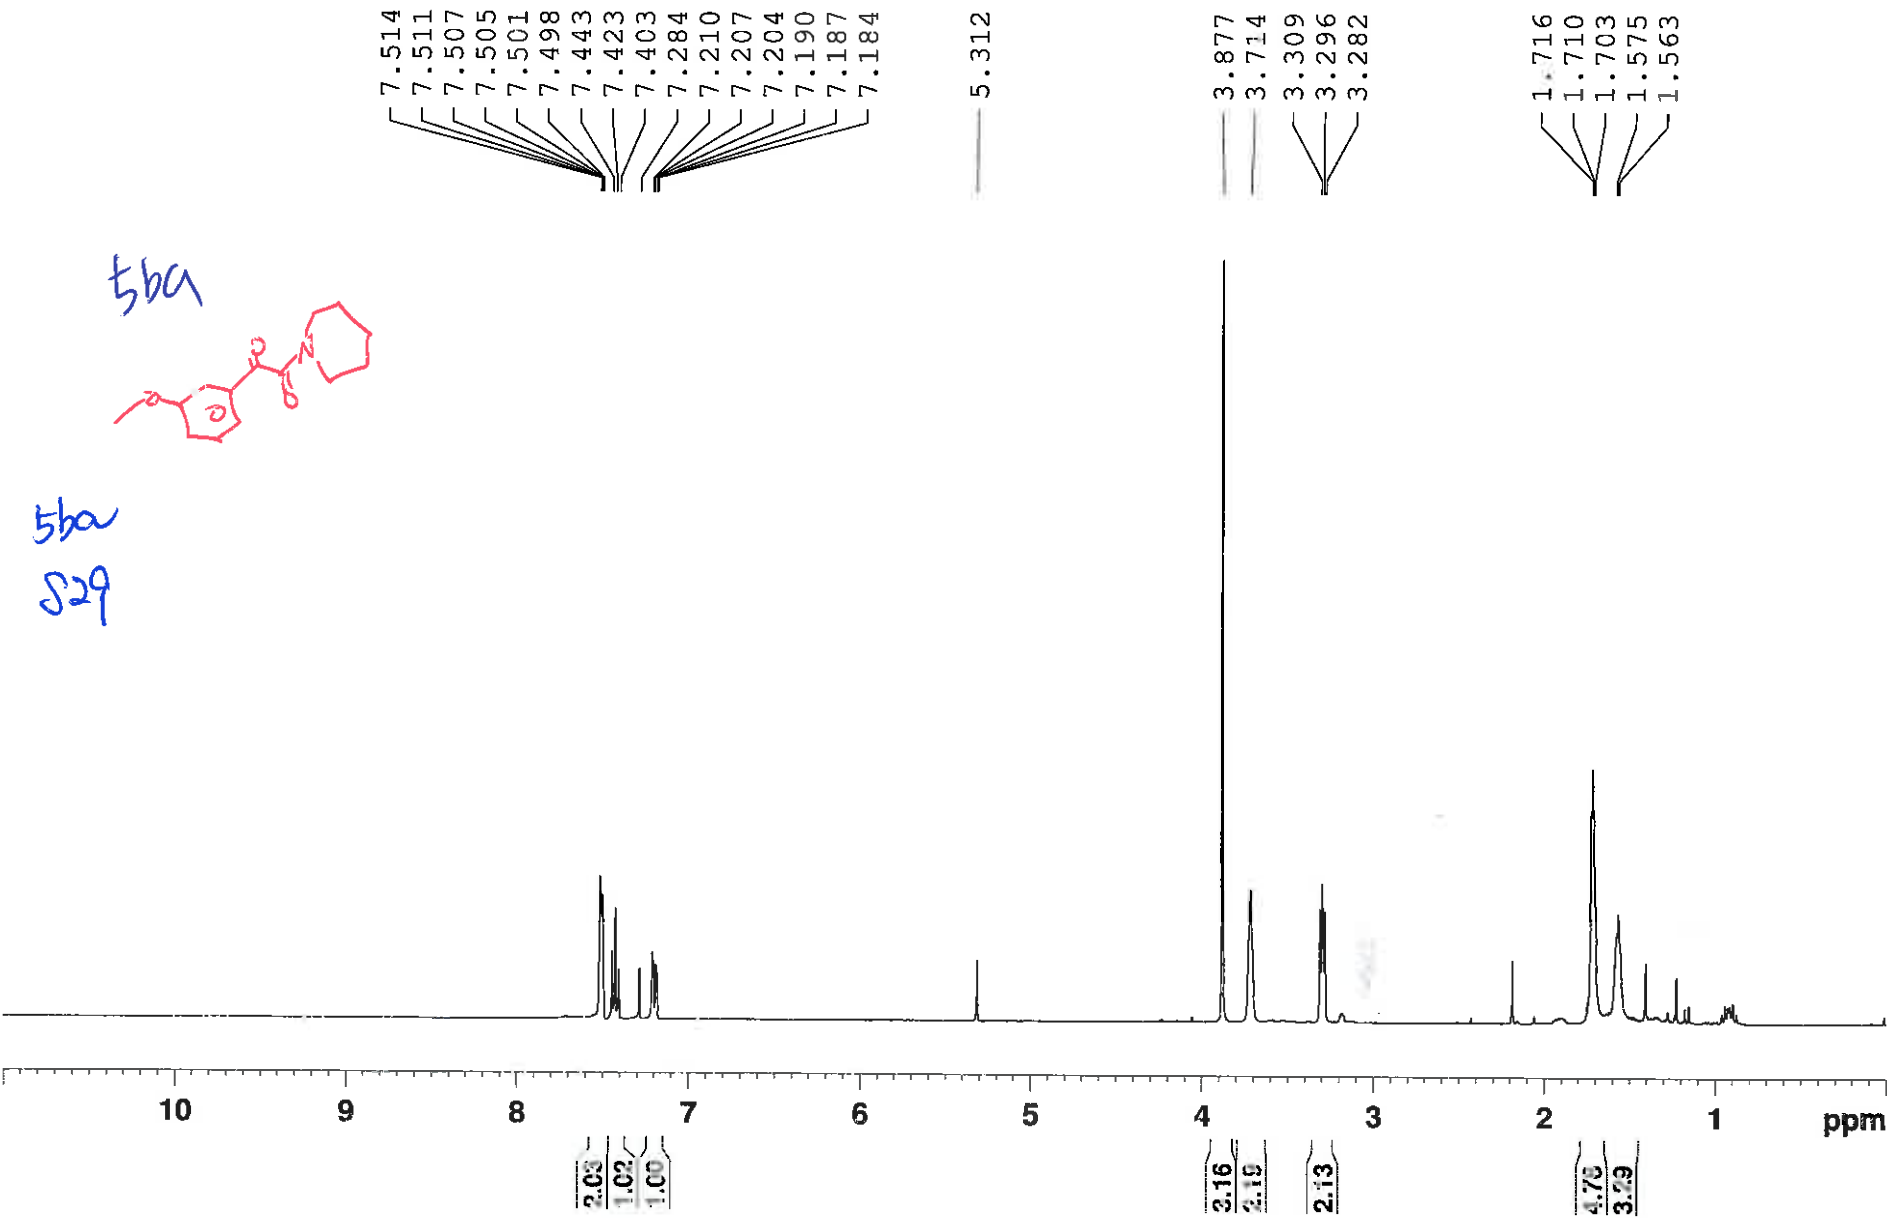

ZJ06-122-2-13C    400 MHz CDCl3

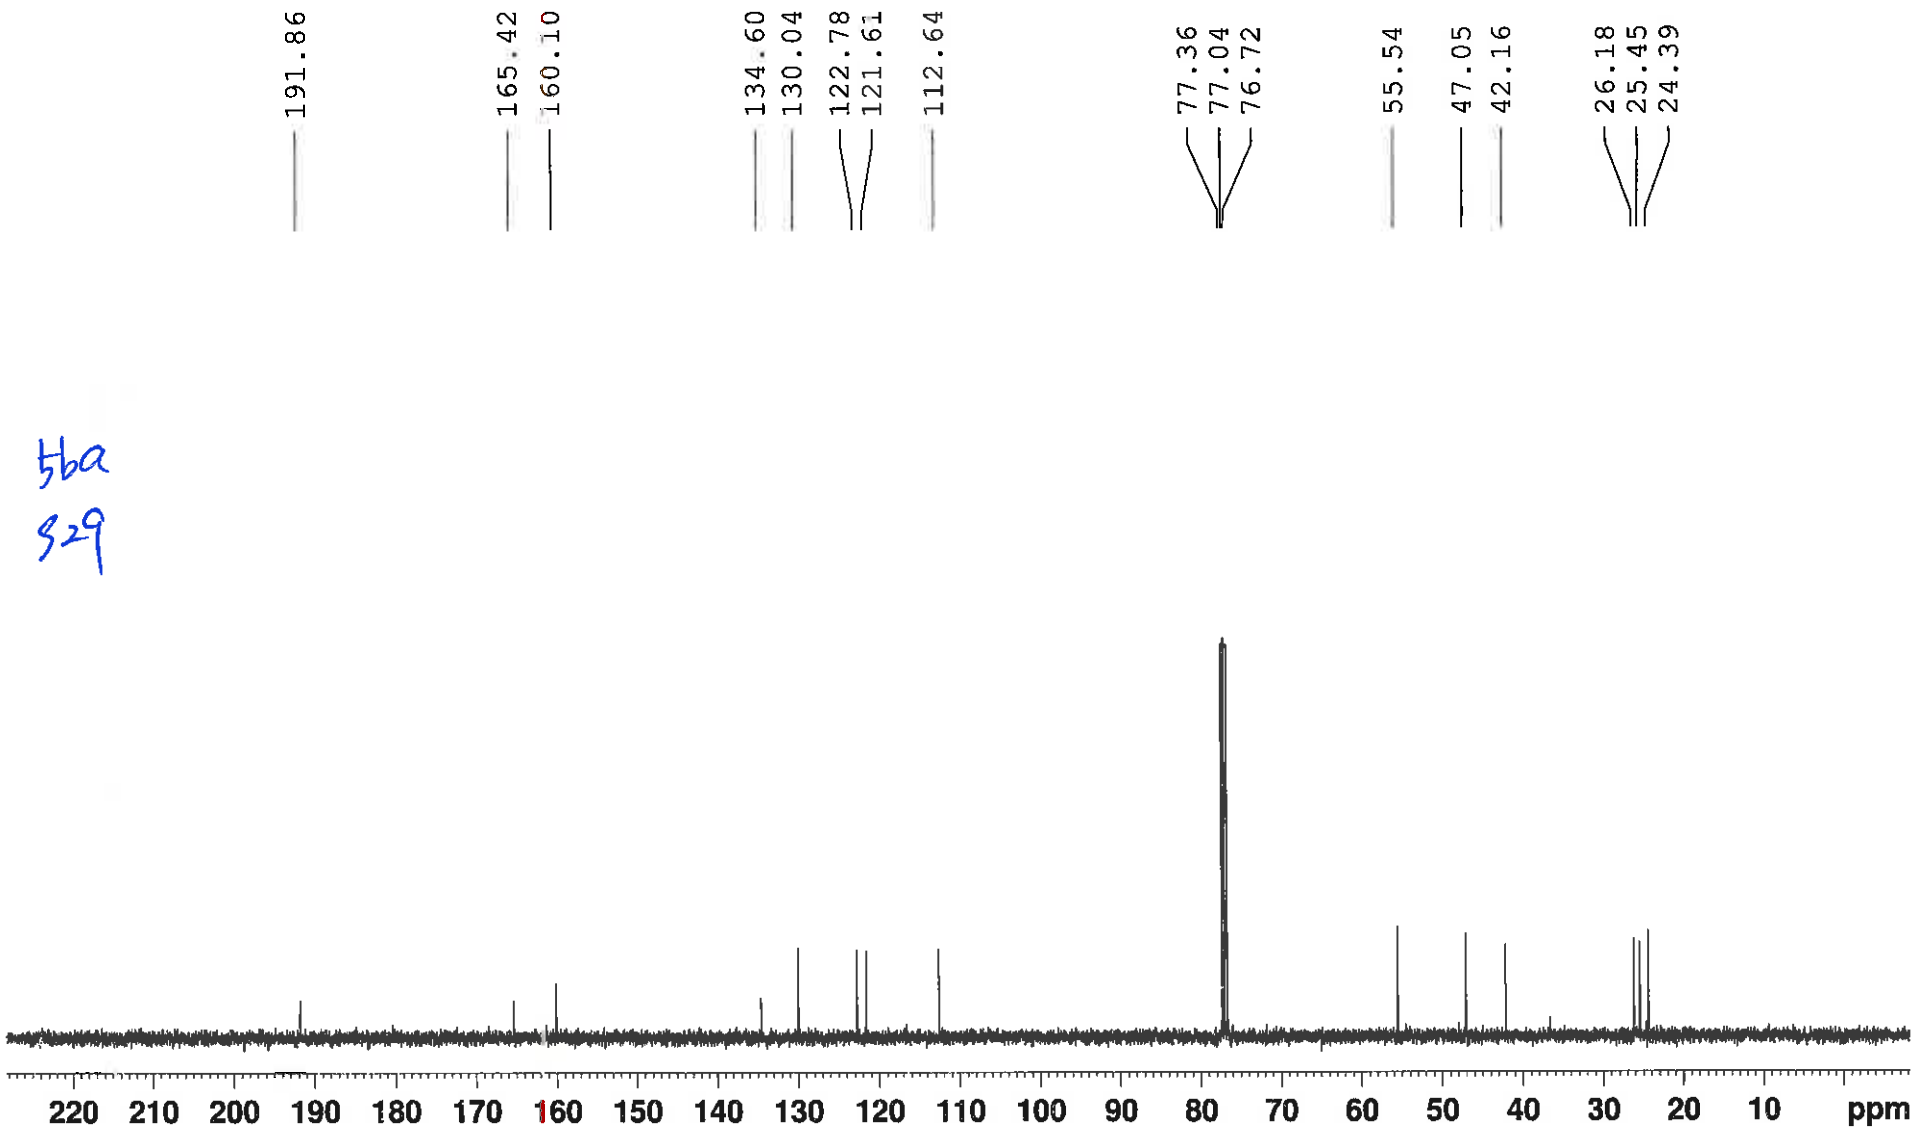

ZJ06-186-1, CDCl<sub>3</sub>, 400M, 1H

7.431  
7.423  
7.259  
7.143  
7.135  
7.120  
7.112  
6.940  
6.917

3.825  
3.801  
3.639  
3.624  
3.612  
3.313  
3.299  
3.285

1.689  
1.676  
1.669  
1.650  
1.586  
1.572  
1.559

5da

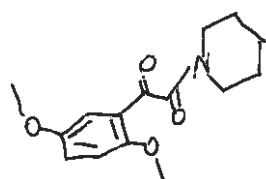

5da  
S30

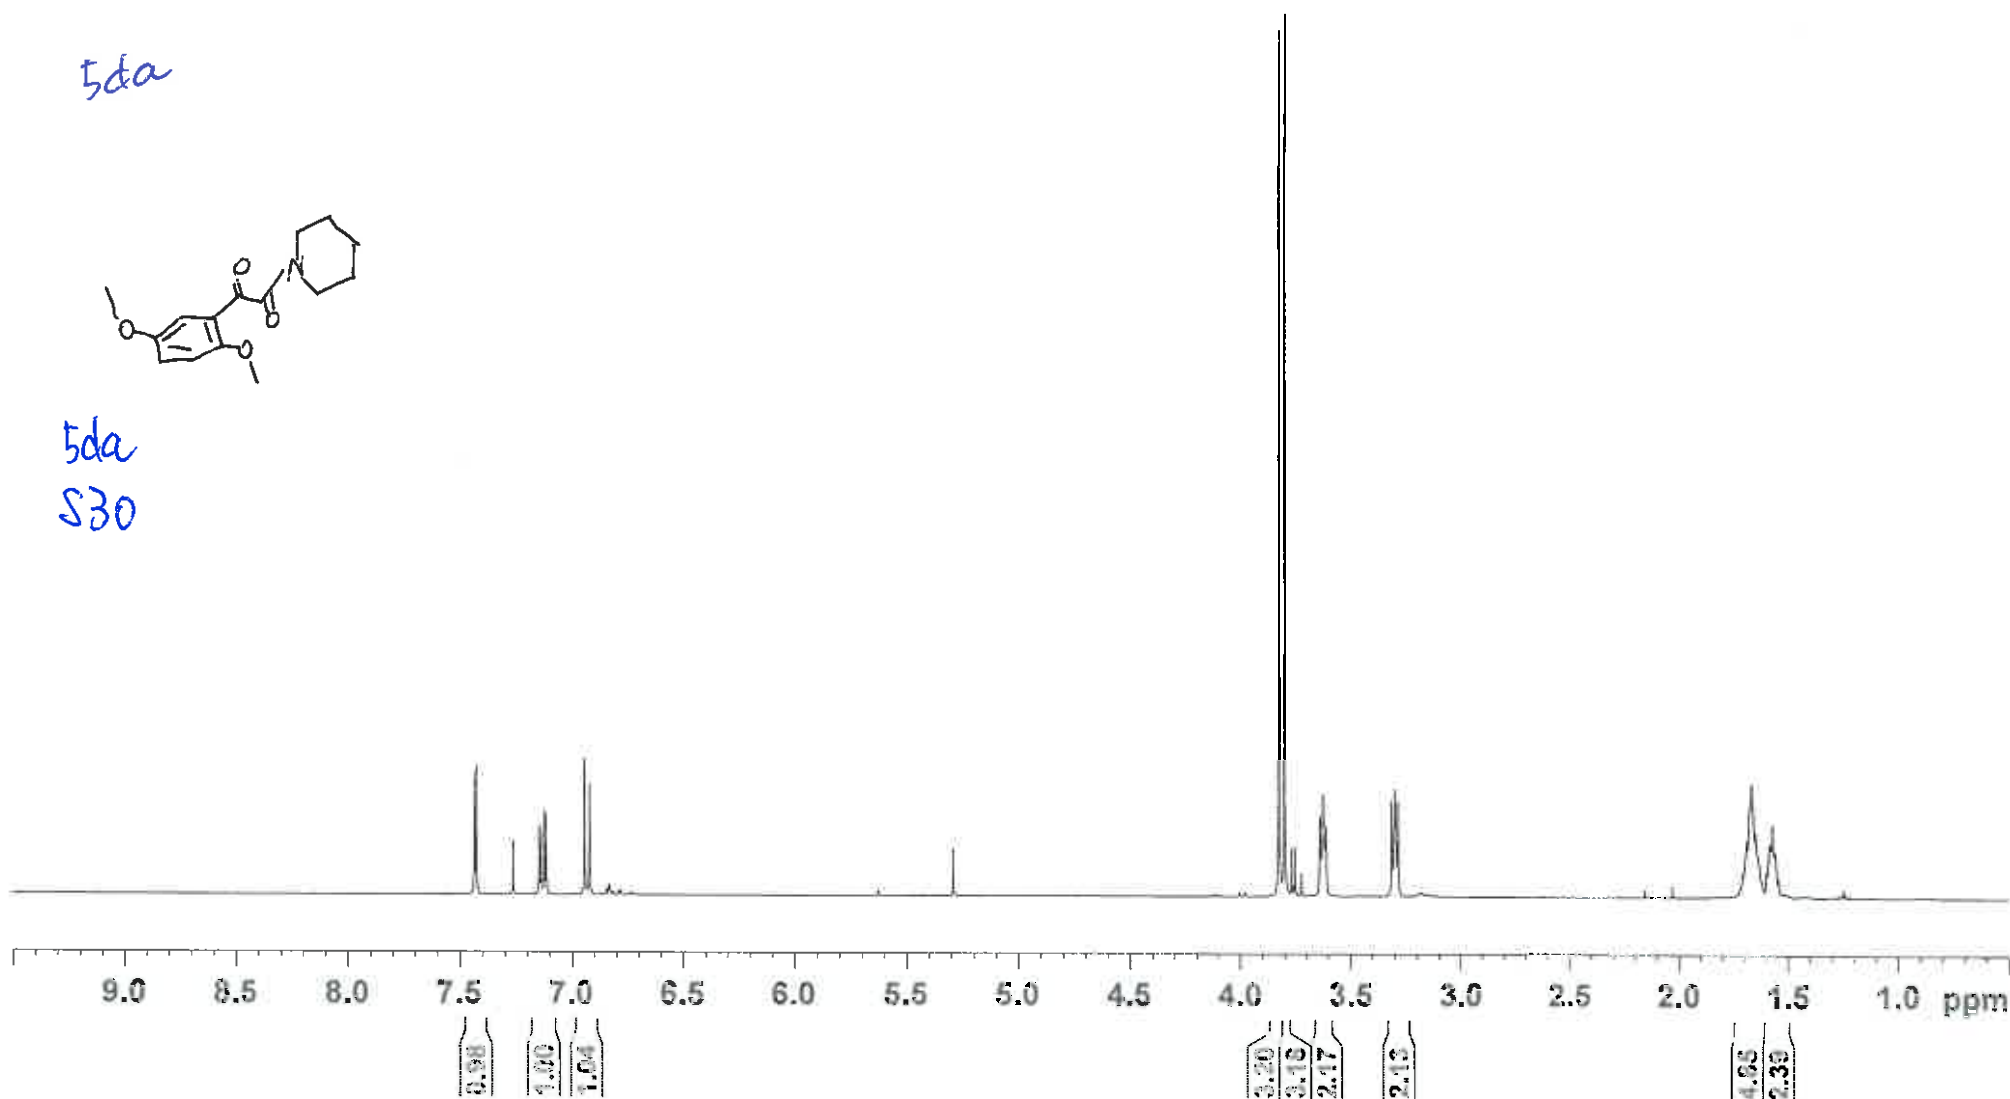

ZJ06-186-1-13C, CDCl3, 400M, 1H

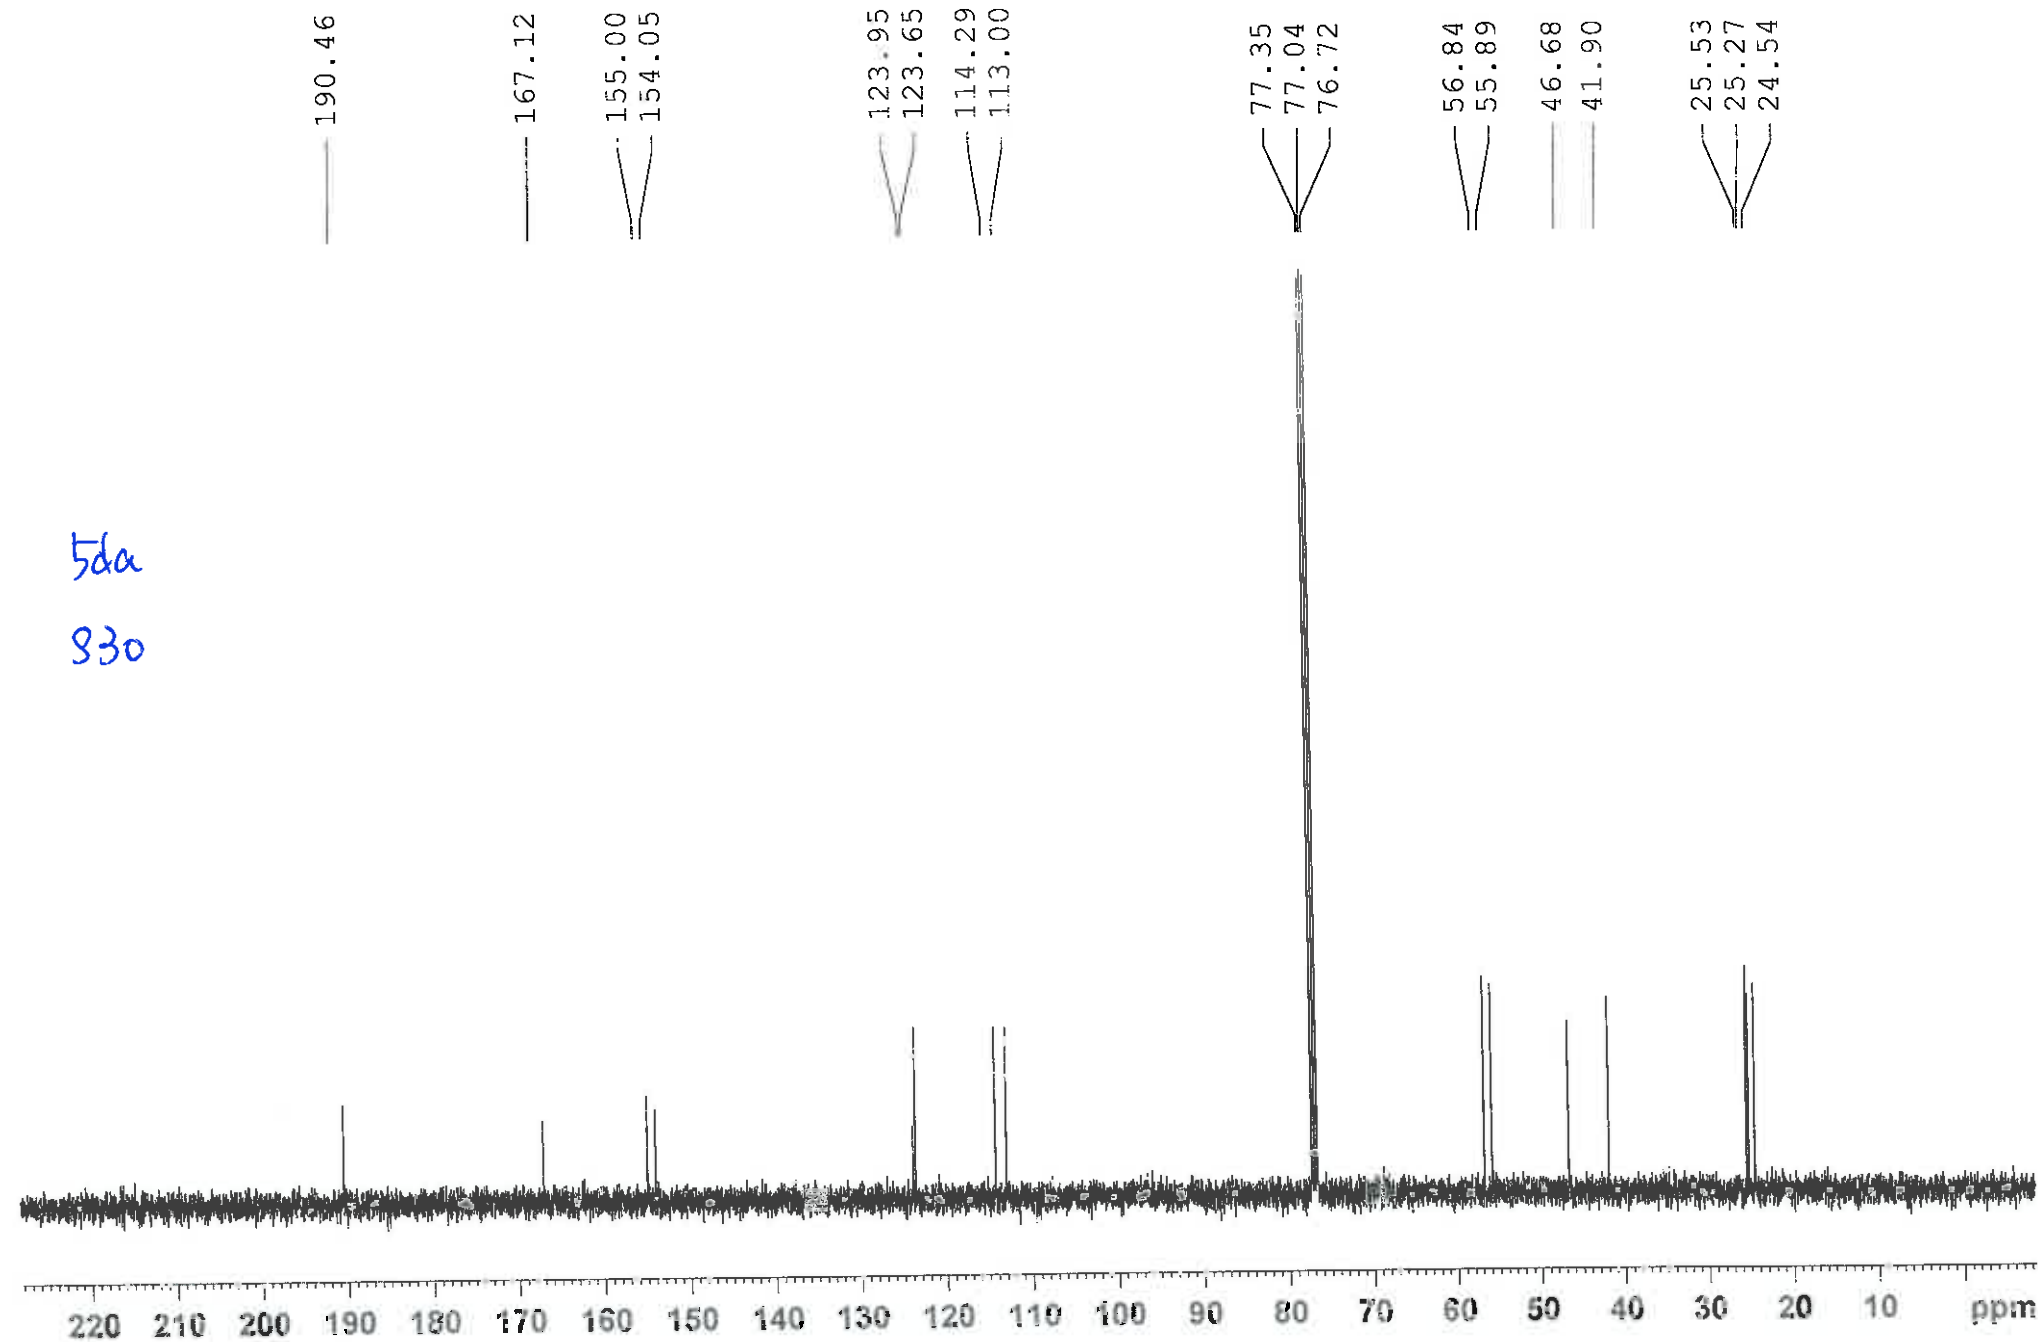



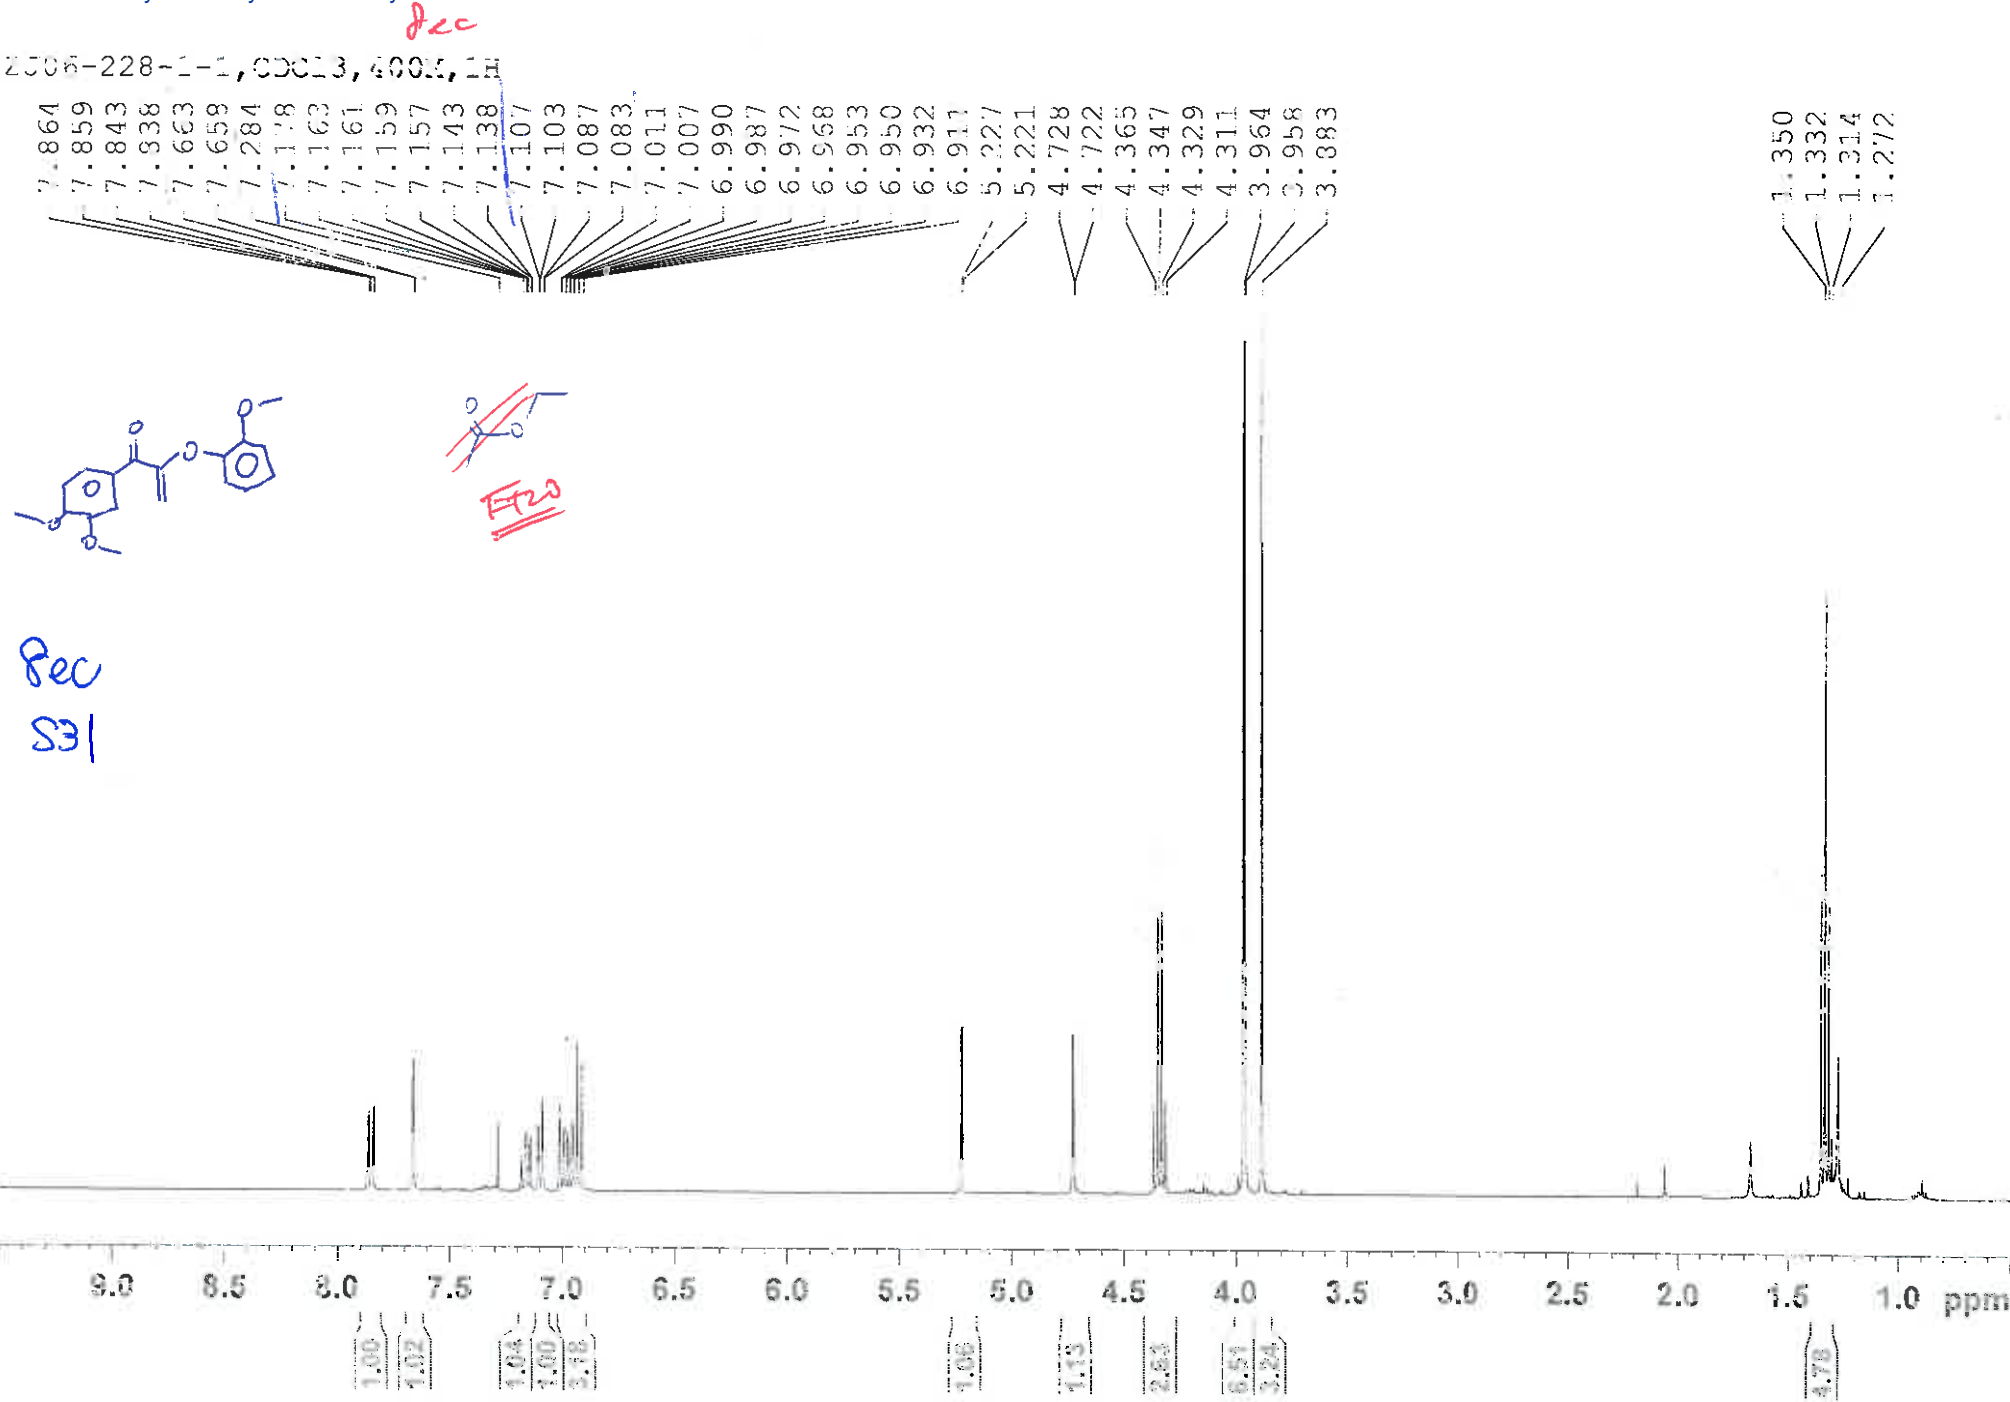

Z006-228-1-1-13C, CDCl<sub>3</sub>, 400M, 1H

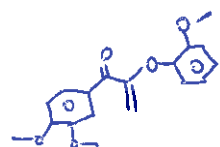

pec

S31

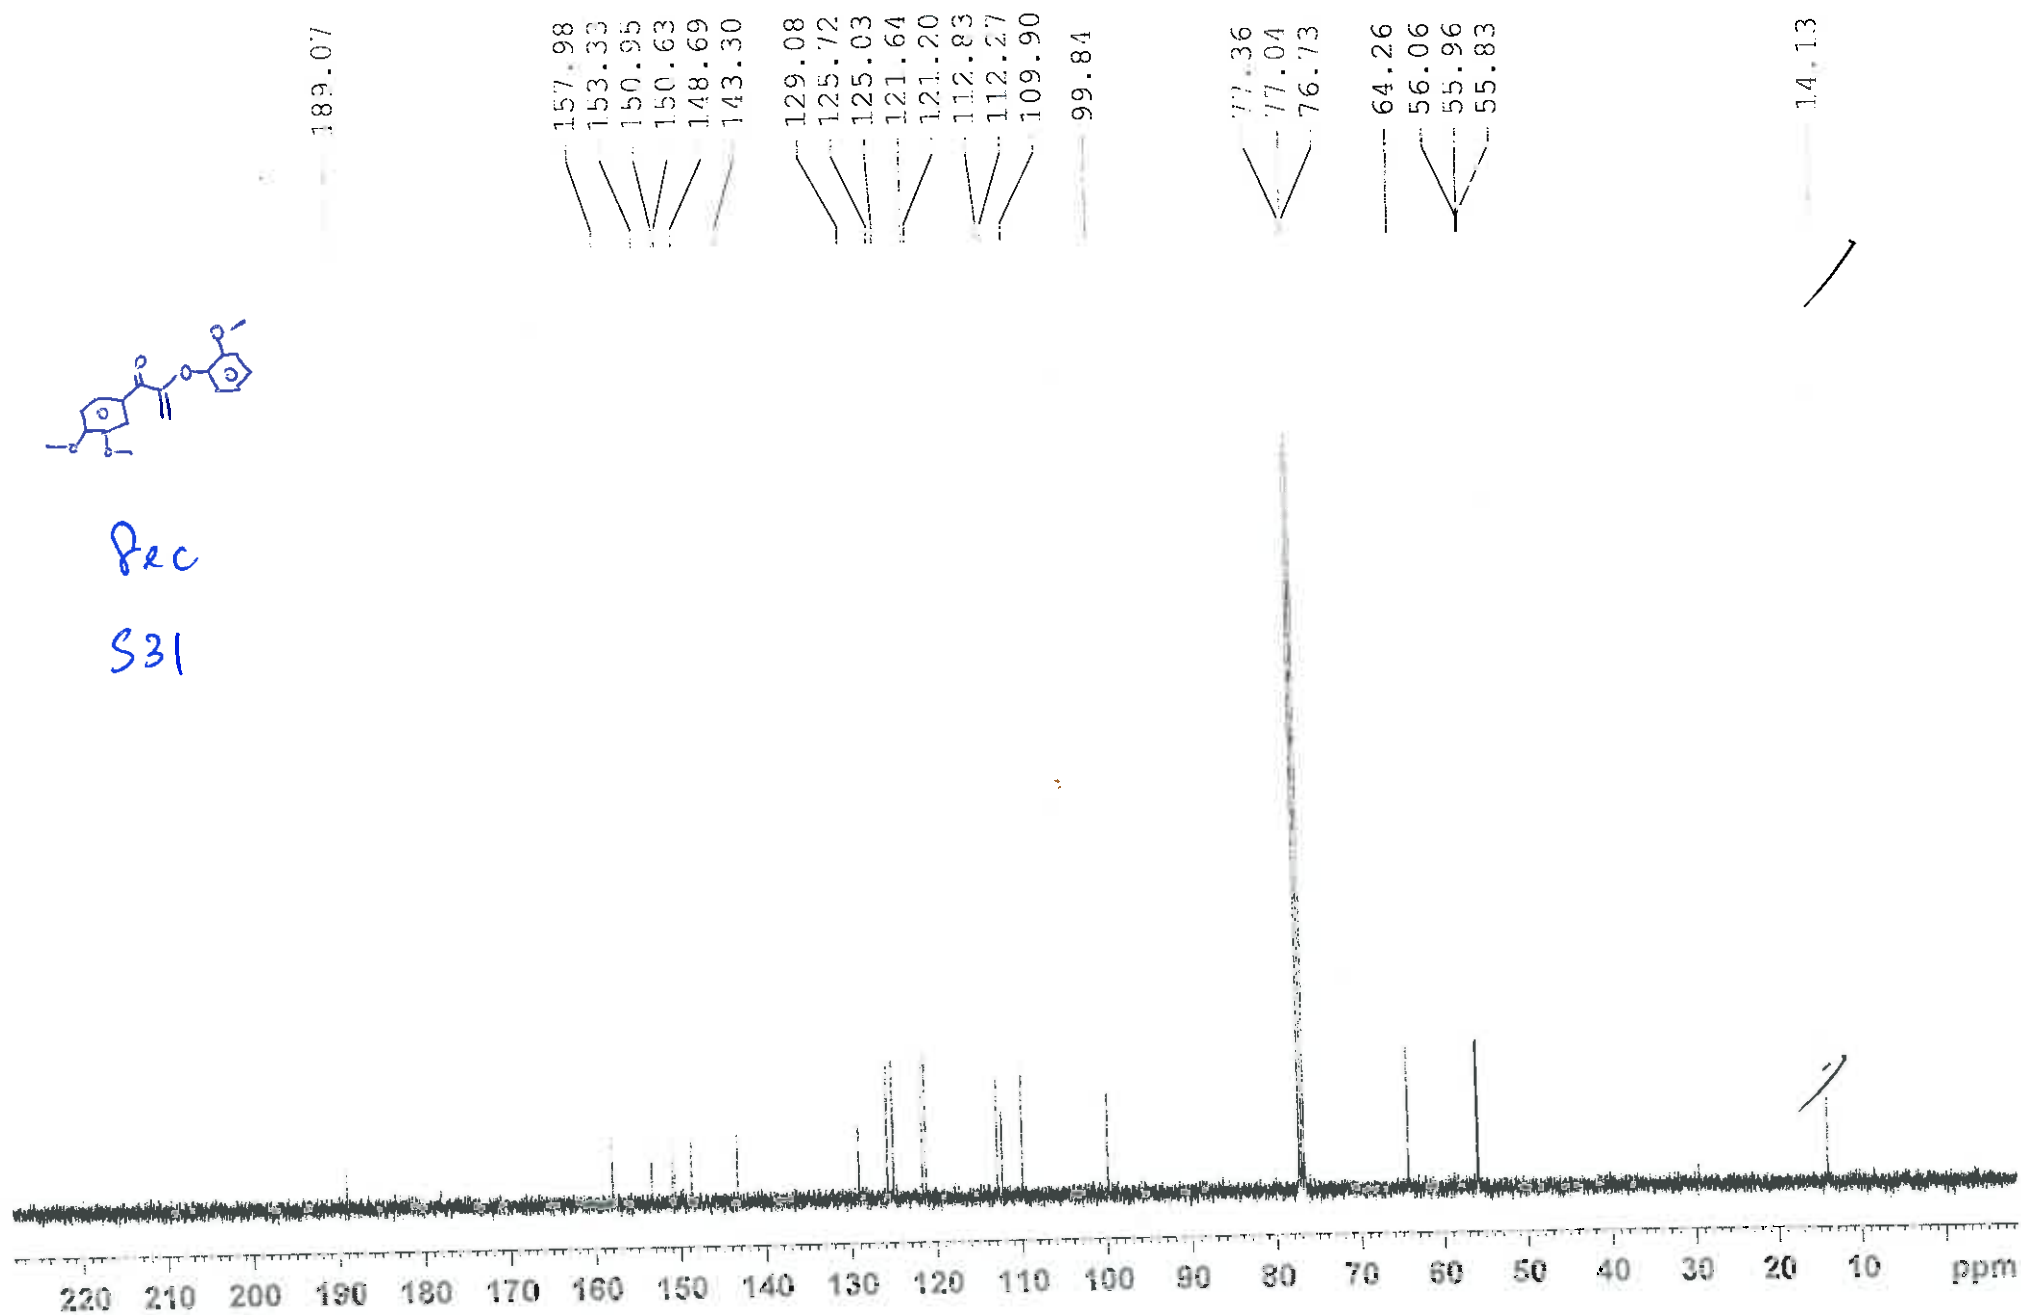

Supplement: c3cc46912c_2.pdf [file c3cc46912c_2.pdf]
